# Supplementary material for: Bicomponent CuO/NiCo2O4 nanocomposites for the dehydrogenation of ammonia borane and the tandem hydrogenation of halogenated nitroaromatics
Source: Royal Society of Chemistry journal article supplement (doi:10.1039/d3re00295k), 2023-01-01
Supplement: d3re00295k1.pdf [file d3re00295k1.pdf]

## Support Information

# **Bicomponent CuO/NiCo<sub>2</sub>O<sub>4</sub> Nanocomposites for Dehydrogenation of Ammonia Borane and Tandem Hydrogenation of Halogenated Nitroaromatics**

Xusheng Yang <sup>a</sup>, Ping Li<sup>a</sup>, Jiahao Wu<sup>a</sup>, Le Zhou<sup>a</sup>, Bin Xu<sup>a\*\*</sup>, Xiaobin Zhang<sup>b</sup>,

Xiaoqiang Liu<sup>a</sup>, Pingchuan Pan<sup>b</sup>, Weidong Jiang<sup>a\*</sup>

<sup>†</sup> School of Chemistry and Environmental Engineering, Sichuan University of Science & Engineering, Sichuan Zigong 643000, P. R. China;

<sup>‡</sup> Radiation Chemistry Department, Sichuan Institute of Atomic Energy, Sichuan Chengdu 610101, P. R. China.

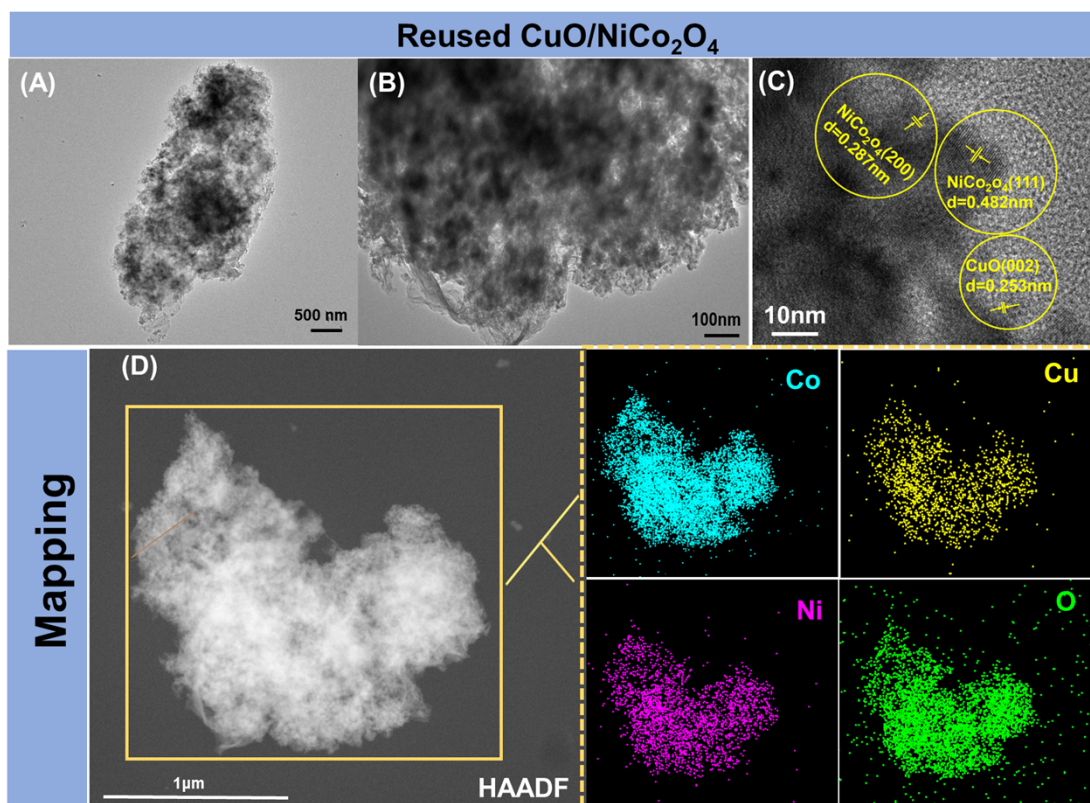

**Fig. S1** TEM images (A-B), HR-TEM image (C), the element mapping (D) of reused CuO/NiCo<sub>2</sub>O<sub>4</sub>.

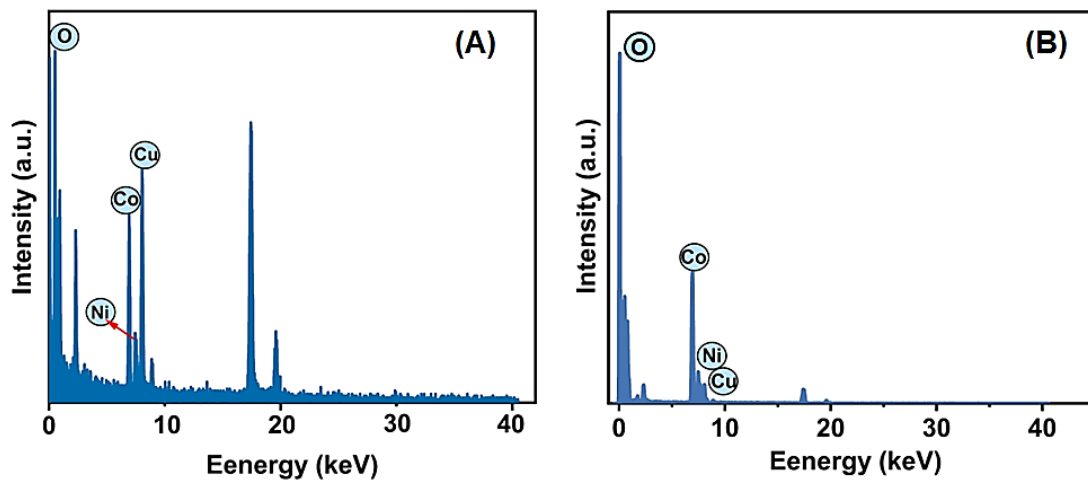

Fig. S2 EDS energy spectra of the fresh CuO/NiCo<sub>2</sub>O<sub>4</sub> (A) and the reused one (B).

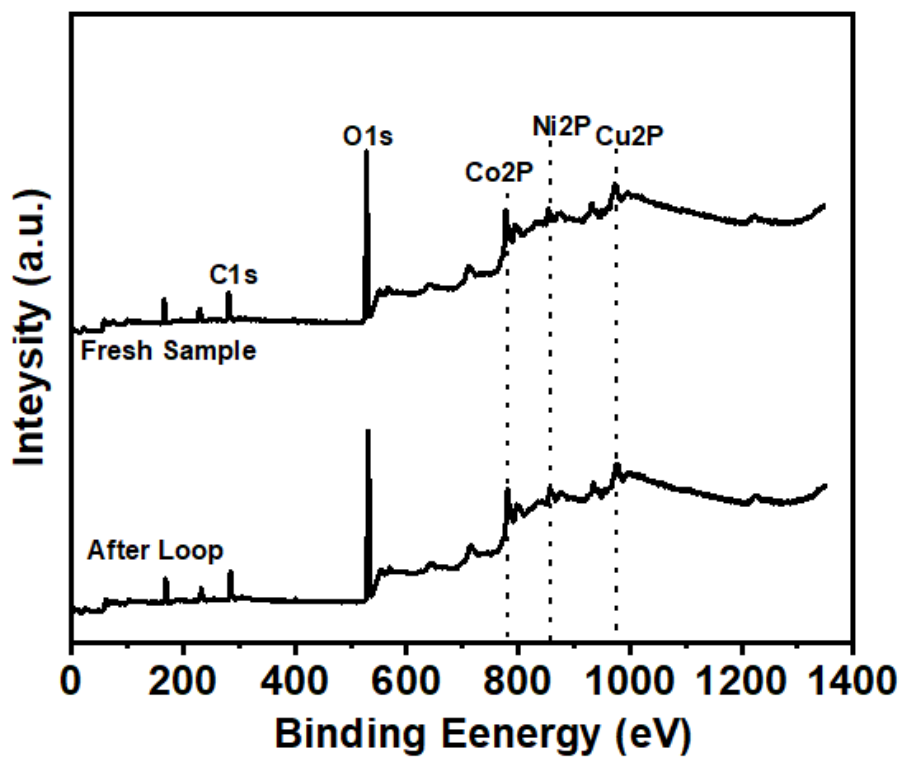

Fig. S3 XPS full spectrum of CuO/NiCo<sub>2</sub>O<sub>4</sub>.

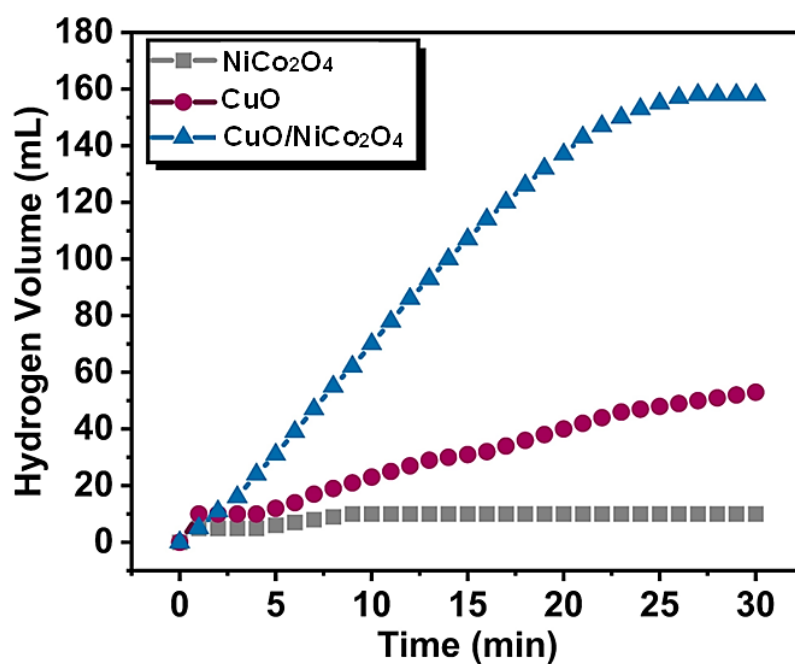

**Fig. S4** Hydrogen production behaviors from AB dehydrogenation catalyzed by CuO/NiCo<sub>2</sub>O<sub>4</sub>, NiCo<sub>2</sub>O<sub>4</sub> and CuO, respectively. Conditions: 25 °C, 30 min, 20 mg Catalyst, 2 mmol AB, 5 mL solvent (CH<sub>3</sub>OH:H<sub>2</sub>O = 3: 2).

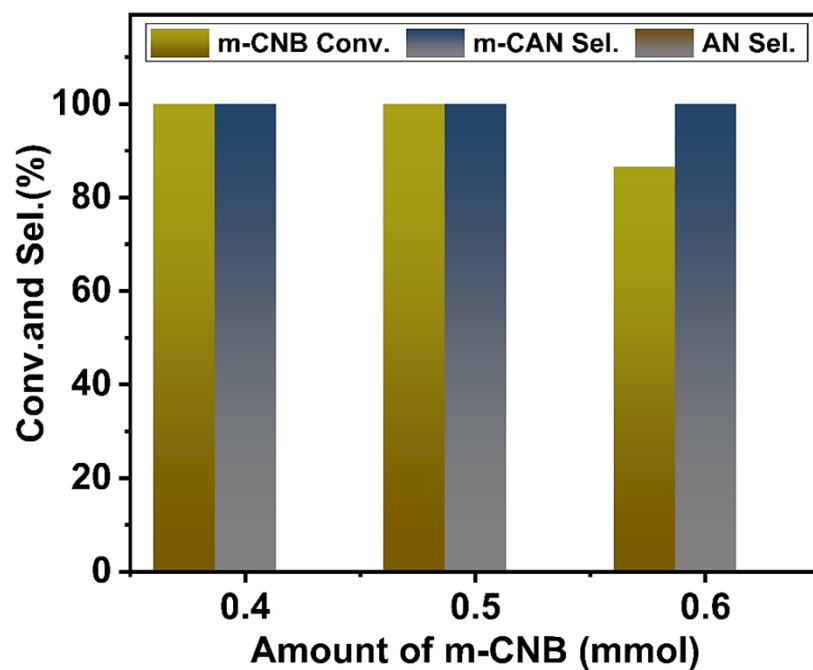

**Fig. S5** Effect of the amount of m-CNB on the in situ m-CNB hydrogenation over CuO/NiCo<sub>2</sub>O<sub>4</sub> in the presence of AB. Conditions: 25°C, 30 min, 20 mg CuO/NiCo<sub>2</sub>O<sub>4</sub>, 2 mmol AB, 5 mL solvent (CH<sub>3</sub>OH:H<sub>2</sub>O = 3: 2).

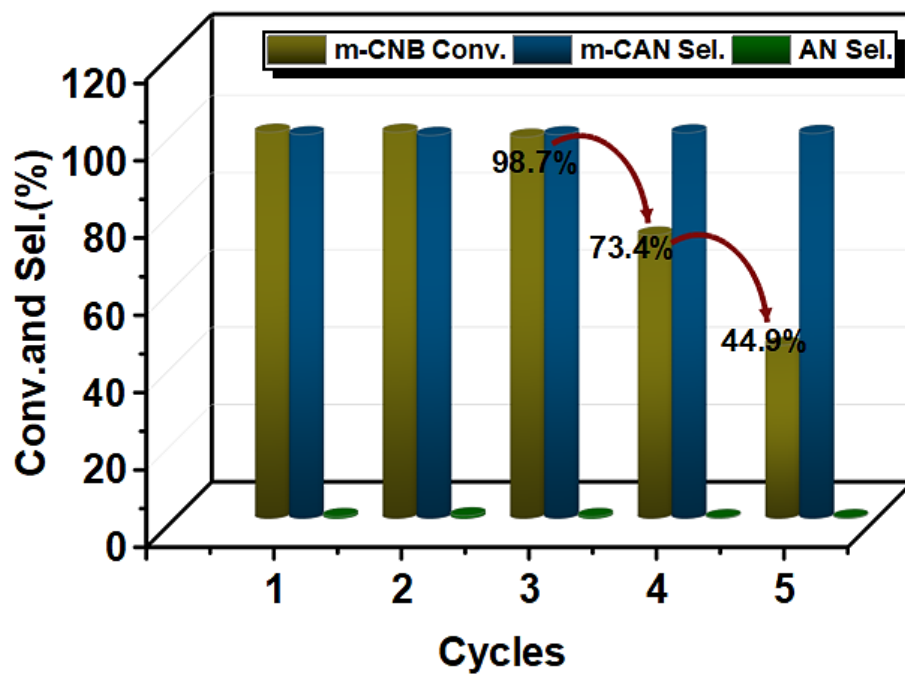

**Fig. S6** Cyclic experiment of sole CuO. Conditions: 25°C,  $n_{AB}$  = 2 mmol,  $n_{m-CNB}$  = 0.5 mmol,  $m_{cat.}$  = 20 mg,  $V_{solvent}$  = 5 mL (CH<sub>3</sub>OH : H<sub>2</sub>O = 3:2)

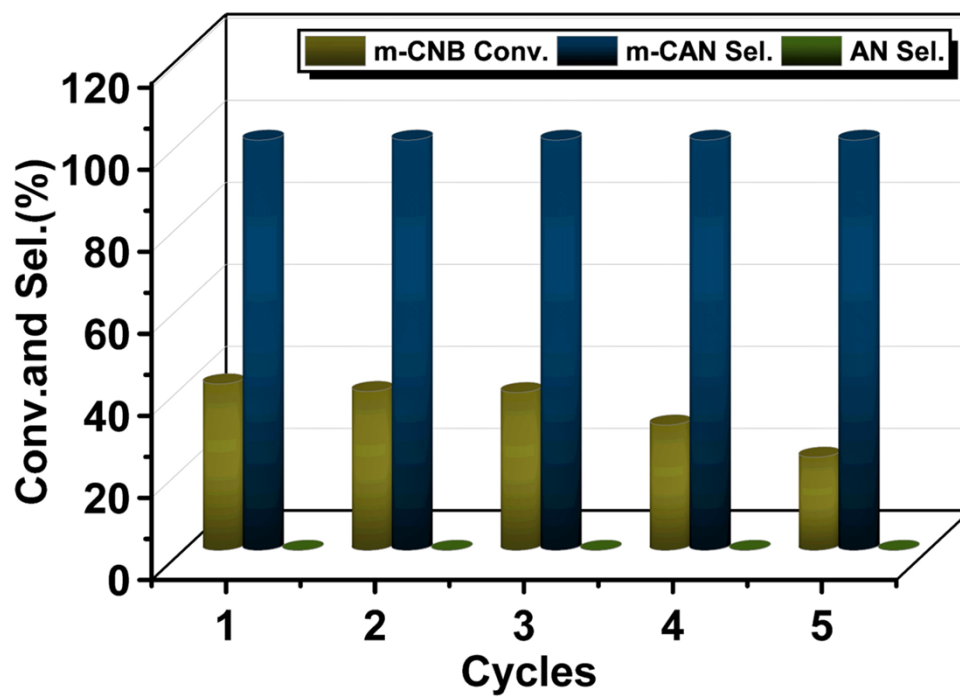

**Fig. S7** Cyclic experiment of  $\text{NiCo}_2\text{O}_4$ . Conditions:  $25^\circ\text{C}$ ,  $n_{\text{AB}} = 2 \text{ mmol}$ ,  $n_{\text{m-CNB}} = 0.5 \text{ mmol}$ ,  $m_{\text{cat.}} = 20 \text{ mg}$ ,  $V_{\text{solvent}} = 5 \text{ mL}$  ( $\text{CH}_3\text{OH} : \text{H}_2\text{O} = 3:2$ )



**Table S1.** Surface compositions of the fresh and reused CuO/NiCo<sub>2</sub>O<sub>4</sub> sample

| <b>Element</b> | <b>Fresh Sample<br/>Atomic/%</b> | <b>Reused Sample<br/>Atomic/%</b> |
|----------------|----------------------------------|-----------------------------------|
| <b>O1s</b>     | 79.98                            | 81.49                             |
| <b>Co2p</b>    | 12.05                            | 11.26                             |
| <b>Ni2p</b>    | 4.48                             | 5.13                              |
| <b>Cu2p</b>    | 3.49                             | 2.12                              |

*Note:* Data listed here are estimated from XPS determination. C 1s atom % is not shown here because it does not belong to bulk catalyst sample.

**Table S2.** Comparison of tandem hydrogenation of m-chloronitrobenzene (m-CNB) catalyzed by different catalysts <sup>a</sup>

| Entry          | Catalyst                               | Conv. | Sel.  |     |
|----------------|----------------------------------------|-------|-------|-----|
|                |                                        |       | m-CAN | AN  |
| 1              | NiCo <sub>2</sub> O <sub>4</sub>       | 40.7  | 100   | 0   |
| 2              | CuO                                    | 99.2  | 99.7  | 0.8 |
| 3 <sup>b</sup> | NiCo <sub>2</sub> O <sub>4</sub> + CuO | 81.7  | 100   | 0   |
| 4              | CuO/NiCo <sub>2</sub> O <sub>4</sub>   | 100   | 100   | 0   |

Reaction conditions: a 25 °C, n<sub>m-CNB</sub> = 0.5 mmol, n<sub>AB</sub> = 2 mmol, m<sub>cat.</sub> = 20 mg, 5 mL solvent (CH<sub>3</sub>OH:H<sub>2</sub>O = 3:2); b 25 °C, n<sub>m-CNB</sub> = 0.5 mmol, n<sub>AB</sub> = 2 mmol, m<sub>cat.</sub> = 20 mg (NiCo<sub>2</sub>O<sub>4</sub>, 10 mg; CuO, 10 mg), 5 mL solvent (CH<sub>3</sub>OH:H<sub>2</sub>O = 3:2)

**Table S3.** ICP-OES data for fresh and reused CuO/NiCo<sub>2</sub>O<sub>4</sub> samples.

| Entry | Catalyst                                       | Co(wt%) | Ni(wt%) | Cu(wt%) |
|-------|------------------------------------------------|---------|---------|---------|
| 1     | Fresh<br>CuO/NiCo <sub>2</sub> O <sub>4</sub>  | 14.6    | 4.30    | 35.2    |
| 2     | Reused<br>CuO/NiCo <sub>2</sub> O <sub>4</sub> | 34.0    | 18.1    | 23.7    |
